# Supplementary material
Source: PubMed Central journal article supplement (PMC3697262)
Supplement: JB.00244-13_zjb999092642so1.pdf [file JB.00244-13_zjb999092642so1.pdf]

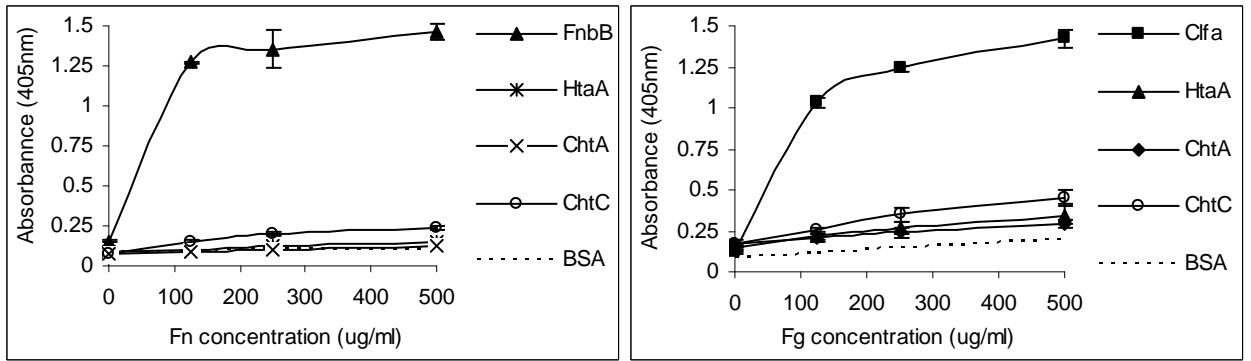

Fig. S1. An ELISA procedure was used to assess the ability of fibronectin (Fn-left panel) and fibrinogen (Fg-right panel) to bind to various purified bacterial surface proteins. Increasing concentration of either Fn or Fg were incubated with target proteins that were fixed to micro-titer plates. Binding of Fn or Fg to the target proteins was detected using Fn or Fg specific antibodies. Values are the mean of three independent experiments ( $\pm$ SD). FnbB and ClfA are *S. aureus* fibronectin binding protein B and clumping factor A, respectively.

TABLE S1. Primers used in this study

| Primer                                       | Amplified region                                   | Approx. Fragment Size (bp) | Sequence <sup>a</sup>                                                                                                                        |
|----------------------------------------------|----------------------------------------------------|----------------------------|----------------------------------------------------------------------------------------------------------------------------------------------|
| <b><u>Deletion mutants</u></b>               |                                                    |                            |                                                                                                                                              |
| chtAUP1<br>chtAUP2                           | Upstream of <i>chtA</i>                            | 720                        | 5'-GCGGGATCCTGCCACTGTTGTGGTGA-3'<br>5'-GCGCCC <del>GGG</del> ACACAAACCGTGAAAGG-3'                                                            |
| chtADN1<br>chtADN2                           | Downstream of <i>chtA</i>                          | 2060                       | 5'-GCGGGATCCGTCCATCACTTCTTTGG-3'<br>5'-GCGAAGCTTCCC <del>GGG</del> TTGCTCGCGCATGAGCC-3'                                                      |
| chtBUP1<br>chtBUP2                           | Upstream of <i>chtB</i>                            | 1120                       | 5'-GCGGGATCCGGAACGGTTACATCACATAACC-3'<br>5'-GCGCCC <del>GGG</del> TGTAGACGCCAACAAAGG-3'                                                      |
| chtABDN3<br>chtABDN4                         | Downstream of <i>chtB</i>                          | 1600                       | 5'-GCGGGATCCGCACCAAGCGCTAGAGC-3'<br>5'-GCGAAGCTTCCC <del>GGG</del> CTATATCGATGCTCAGG-3'                                                      |
| chtC-UP1<br>chtC-UP2                         | Upstream <i>chtC</i>                               | 690                        | 5'-GCGGGATCCCTTGCCTGAAGTGGCGA-3'<br>5-GCGAAGCTTAGG <del>CCT</del> CCTCCAAGTCTGAAGAAGC-3'                                                     |
| chtC-DN1<br>chtC-DN2                         | Downstream <i>chtC</i>                             | 900                        | 5'-GCGGGATCCGGCAAGCTGTCCACAGTG-3'<br>5'-GCGAGG <del>CCT</del> CACCAAGGACGACGCCG-3'                                                           |
| <b><u>Promoter fusions</u></b>               |                                                    |                            |                                                                                                                                              |
| chtBPo-SalI<br>chtBPo-BamHI                  | <i>chtB</i> promoter                               | 390                        | 5'-GCGGTCGACGTGGAAGATTATTCTTGG-3'<br>5'-GCGGGATCCC <del>GGC</del> CAGCACCGACTACCG-3'                                                         |
| 7.40B<br>7.40A                               | <i>chtA</i> promoter                               | 211                        | 5'-GCGGGATCCCAAAGACGTAAGTGTTC-3'<br>5'-GCGGTCGACGAGTTGTGGTCTAGGTGG-3'                                                                        |
| PO1UP<br>PO1DN<br>PO2UP<br>PO3DN             | <i>cirA</i> promoter                               | 269<br>166<br>114          | 5'-GCGGTCGACCATCAGAACTAACCACC-3'<br>5'-GCGGGATCCAGACTTGAGTGGTAG-3'<br>5'-GCGGTCGACGCACACAATAAAAGAAG-3'<br>5'-GCGGGATCCTTATTGTGTGCTTGTGGGG-3' |
| <b><u>Protein expression GST-fusions</u></b> |                                                    |                            |                                                                                                                                              |
| FGex522RI<br>RXho522-Tm                      | <i>chtC</i> for pGEX-6P-1<br>without transmembrane | 1800                       | 5'-GCGGAATTCGAGGACGTCGAAAAGCCT-3'<br>5'-GCGCTCGAGCTAAAGCCACCTGTGGATGAT-3'                                                                    |
| FGex523RI<br>RXho523-Tm                      | <i>cirA</i> for pGEX-6P-1<br>without transmembrane | 840                        | 5'-GCGGAATTCTCTGAGCCCCTGCCGAC-3'<br>5'-GCGCTCGAGCTACTTGAAAAAGTAACTAT-3'                                                                      |
| FGexChtBRI<br>RXhoChtB-Tm                    | <i>chtB</i> for pGEX-6P-1<br>without transmembrane | 720                        | 5'-GCGGAATTCGAAAACGTGGCTGCTACC-3'<br>5'-GCGCTCGAGCTATTTAGGGAGACCGCCAAA-3'                                                                    |
| FGexChtARI<br>RXhoChtA-Tm                    | <i>chtA</i> for pGEX-6P-1<br>without transmembrane | 2100                       | 5'-GCGGAATTCGAGCACGTAGTGGAGGAT-3'<br>5'-GCGCTCGAGCTACTTCCACGGCTTAGAAAG-3'                                                                    |
| <b><u>Strep-tag fusions</u></b>              |                                                    |                            |                                                                                                                                              |
| FstrepChtA<br>RstrepChtA                     | <i>chtA</i> strep tag                              | 2050                       | 5'-GCGCATATGGCAAGCTGGAGCCACCCGCAGTTC<br>GAAAAGGGTGCAGAGCACGTAGTGGAGGAT-3'<br>5'-GCGGAATTCCTACTTCCACGGCTTAGAAAG-3'                            |

|               |                        |      |                                                                                    |
|---------------|------------------------|------|------------------------------------------------------------------------------------|
| RstrepChta-CR | <i>chtA</i> -CR        | 700  | 5'-GCG <u>GAAATTC</u> CTATGATTTGTCAAAACTAAA-3'                                     |
| FstrepChtA-CT | <i>chtA</i> C-terminal | 1320 | 5'-GCGCATATGGCAAGCT <b>TGGAGCCACCCGCAGTTC</b><br>GAAAAGGGTGCATCACAACCTGGCGATAAT-3' |
| FstrepChtB    | <i>chtB</i> strep tag  | 800  | 5'-GCGCATATGGCAAGCT <b>TGGAGCCACCCGCAGTTC</b><br>GAAAAGGGTGCAGAAAACGTGGCTGCTACC-3' |
| RstrepChtB    |                        |      | 5'-GCG <u>GAAATTC</u> CTAGATGCCCCAGATTTTAGG-3'                                     |
| FstrepChtC    | <i>chtC</i> strep tag  | 1850 | 5'-GCGCATATGGCAAGCT <b>TGGAGCCACCCGCAGTTC</b><br>GAAAAGGGTGCAGAGGACGTCGAAAAGCCT-3' |
| RstrepChtC    |                        |      | 5'-GCG <u>GAAATTC</u> CTACTTGCCCCAAAACGCTCGA-3'                                    |

---

<sup>a</sup>Restriction sites are underlined and bold indicates strep tag sequence.
